# Supplementary material for: Differential Induction Pattern Towards Classically Activated Macrophages in Response to an Immunomodulatory Extract from Pleurotus ostreatus Mycelium
Source: MDPI journal article supplement (doi:10.3390/jof7030206), 2021-03-11
Supplement: s1 [file s1]

SOP: Cell culture - macrophages

Author: Ellen Lanckacker

Version: 1

Date : 09/09/2015

## TOPIC: Macrophage polarisation and evaluation

### AIM:

- *In vitro differentiation of primary bone marrow cells into different macrophage subsets.*
- *Discrimination between classically activated M1 and alternatively activated M2 macrophages, using flow cytometry in conjunction with qRT-PCR.*

### Keywords

Macrophage, polarisation, isolation, flow cytometric evaluation, qRT-PCR

## 1. Collection and preparation primary bone marrow cells

### Materials

- ✓ Dissection material (e.g. scalpel, scissors, forceps)
- ✓ 15 ml Falcon (BD)
- ✓ Filter tips
- ✓ Syringes
- ✓ Needles (25G, 21G)
- ✓ ACK (Ammonium Chloride Potassium solution) ([SOP n° 61](#))
- ✓ KOVA counting chamber
- ✓ 6-well, 24-well plate
- ✓ L929 supernatant (SOP n°)

| Reference number | Firm              | Product                        | LMPH number |
|------------------|-------------------|--------------------------------|-------------|
| P2256            | Sigma-Aldrich     | RPMI 1640                      | 534         |
|                  |                   | Non-Essential Amino Acids      | 55          |
|                  |                   | PeniStrep                      |             |
|                  |                   | Sodium pyruvate                |             |
|                  |                   | L-glutamine                    | 536         |
| 14190-094        | Life Technologies | Inactivated Fetal bovine serum |             |
|                  |                   | Phosphate Buffered Saline      |             |

### Methods

- Euthanize mice (CO<sub>2</sub>) and disinfect the skin with ethanol. From now on, work under the laminar flow.
- Remove the hind legs.
- Remove most of the skin and muscles until the femur and tibia are completely clean
- Carefully cut off both ends of the bone until a small red dot is seen (= bone marrow) and flush with 1 ml RPMI (25G needle). Repeat until the cavity is white.
- Collect the bone marrow in a sterile 15ml falcon tube and keep on ice.
- To make a single cell suspension, aspirate the cells using a 21G needle and pore the cells through a 25G needle. If necessary, repeat the procedure. Do not repeat this more than 2 times, if this can damage the cells.
- Centrifuge the cells for 10' @ 2000 rpm, remove the supernatant.
- To lyse the red blood cells, pipet 3 ml ACK on the pellet and resuspend. Stop cell lysis after 3' by adding excess RPMI to the cells.
- Centrifuge for 10' @ 2000 rpm, remove the supernatant.
- Rinse the cells 2x with RPMI and dissolve the pellet in RPMI to count the cells with a KOVA<sup>®</sup> chamber.
- Adjust the cells to the right concentration (10<sup>6</sup> cells/ml), bring in a 6-well (3-5ml/well) or 24-well plate (1ml/well) and let the cells attach for 24h (RPMI without iFBS).
- Change the medium with enriched RPMI medium (+1% NEAA + 1% penistrep + 1% sodium pyruvate +1% L-glutamine + 10% iFBS + 15% L929 supernatant (containing M-CSF)) and incubate the cells for 3 days. The cells have now the M0 phenotype.

## 2. Polarization macrophages

### Materials

- ✓ Eppendorfs
- ✓ Filter tips

| Reference number | Firm          | Product            | LMPH number |
|------------------|---------------|--------------------|-------------|
| L2755            | Sigma-Aldrich | Lipopolysaccharide | 260         |
| I4777            | Sigma-Aldrich | Interferon-gamma   | 306         |
| 404-ML-010       | R&D Systems   | Interleukin-4      | 795         |
| 413-ML-005       | R&D Systems   | Interleukin-13     | 796         |

### Methods

- To differentiate the cells into the M1 phenotype, stimulate the cells with 100 ng/ml LPS (LPS stock: 1 mg → aliquots in -20°C) (+ 25 ng/ml IFN- $\gamma$ , not necessary) and incubate for 24 or 48 hours. To differentiate the cells into the M2 phenotype, incubate the cells with 25 ng/ml IL-4 (+ 25 ng/ml IL-13, not necessary) and incubate cells for 24 or 48 hours.

### 3. Flow cytometric evaluation (on ice!)

#### Materials

- ✓ Eppendorfs
- ✓ Filter tips
- ✓ Flow cytometer

| Reference number | Firm              | Product                               | LMPH number |
|------------------|-------------------|---------------------------------------|-------------|
| 14190-094        | Life Technologies | Phosphate Buffered Saline             | 536         |
| EDS              | Sigma-Aldrich     | Ethylenediaminetetraacetic acid, EDTA | 136         |
| -                | Bioceros          | Fc-block (1/200)                      | 794         |
|                  | BD                | Antibodies (see antibody list)        |             |
|                  |                   | - CD80-FITC (1/100)                   |             |
|                  |                   | - CD86-PECy7 (1/100)                  |             |
|                  |                   | - CD150-APC (1/100)                   |             |
|                  |                   | - CD200R-PE (1/100)                   |             |

#### Methods (on ice!)

- Remove the supernatant (and store @ -80°C for cytokine measurements). Collect the macrophages by bringing cold 5 mM EDTA (in PBS) to the cells and pipet up and down (blue tip + yellow tip) to detach the cells from their culture plate. Centrifuge 10' @ 2000 rpm (4°C)
- Wash the cell pellet 2x with PBS. Centrifuge 10' @ 2000 rpm and discard supernatant. Divide the cells into different vials (according to the number of antibody stainings)
- Bring 50 µl Fc-block (1/200) on the cell pellet and incubate 15'
- Centrifuge 10' @ 2000 rpm and discard supernatant (no wash)
- Bring 50 µl antibody mix on the cell pellet and incubate for 30' (in dark!)
- Wash cells 1x with PBS. Centrifuge 10' @ 2000 rpm
- Resuspend the cell pellet in 250 µl PBS and measure the cells on with flow cytometry (room 7.33) (Macrophage templates: desktop Mac) (Settings: FSC: E00, SSC: 390, FL1: 372, FL2: 406, FL3: 398, FL4: 626) (Settings FSC and SSC: depending on cell type)

#### 4. RNA extraction

##### Materials

- ✓ Eppendorfs
- ✓ Filter tips
- ✓ NanoDrop

| Reference number | Firm              | Product                               | LMPH number |
|------------------|-------------------|---------------------------------------|-------------|
| 14190-094        | Life Technologies | Phosphate Buffered Saline             | 536         |
| EDS              | Sigma-Aldrich     | Ethylenediaminetetraacetic acid, EDTA | 136         |
| 74136            | Qiagen            | RNeasy Plus Mini kit                  | -           |

##### Methods

- Collect the macrophages by bringing cold 5 mM EDTA (in PBS) to the cells and pipet up and down (blue tip + yellow tip) to detach the cells from their culture plate. Centrifuge 10' @ 2000 rpm (4°C).
- Extract RNA by using the RNease Plus Mini kit (Qiagen) according to the manufacturer's instructions. Work under the laminar flow (room 7.32).
- Keep samples on ice.
- Determine the concentration with the NanoDrop.
- Bring all samples to same concentration (with PCR water) (not < 70 ng/μl).
- Store samples at -20°C.

## 5. Generation of cDNA

### Materials

- ✓ Eppendorfs
- ✓ Filter tips
- ✓ Heat block (room 7.32)

| Reference number | Firm                 | Product                                      | LMPH number |
|------------------|----------------------|----------------------------------------------|-------------|
| 600180           | Aglient Technologies | AccuScript High Fidelity RT-PCR System       | 718         |
| 4368814          | ThermoFisher         | High-Capacity cDNA Reverse Transcription kit | 797         |

### Methods

- Thaw all reagents on ice. Make cDNA with the High-Capacity cDNA Reverse Transcription kit or the AccuScript High Fidelity RT-PCR System. If possible, perform all manipulations under the laminar flow (room 7.32)

#### *High-Capacity cDNA Reverse Transcription kit:*

- Calculate the volume of the components needed  
For 10 µl RNA, 10 µl master mix is needed, always take some extra reactions to make sure you have enough.

| Component                         | Volume (µl) / reaction kit |
|-----------------------------------|----------------------------|
| 10x RT buffer                     | 2                          |
| 25x dNTP Mix (100 mM)             | 0,8                        |
| 10x RT random primers             | 2                          |
| MultiScribe Reverse Transcriptase | 1                          |
| Nuclease-free water               | 4,2                        |
| TOTAL (2x master mix)             | 10                         |

- Place the 2x RT master mix on ice and mix gently
- Pipette 10 µl of 2x RT master mix into each epp
- Pipette 10 µl of RNA sample into each epp, pipetting up and down 2 times to mix
- Short spin the samples
- Incubate 10 min at 25 °C (room temperature)
- Incubate 120 min at 37 °C (heat block)
- Incubate 5 min at 85 °C (start counting once it is at 85 °C)
- Store samples at -20°C.

## 6. qRT-PCR

### Materials

- ✓ Eppendorfs
- ✓ Filter tips (20 µl, 10 µl)
- ✓ MicroAmp® Optical 96-well reaction plate (Applied Biosystems)
- ✓ MicroAmp® Optical Adhesive Film (Applied Biosystems)

| Reference number | Firm               | Product                                 | LMPH number |
|------------------|--------------------|-----------------------------------------|-------------|
| 4440040          | Applied Biosystems | Taqman Universal Master mix, no UNG II  | 793         |
| 4331182 (250rxn) | Applied Biosystems | Taqman primer/probe                     |             |
|                  |                    | - hprt                                  | 789         |
|                  |                    | - nos2                                  | 790         |
|                  |                    | - arginase-1                            | 791         |
|                  |                    | - fizz-1                                | 792         |
| 95284-100ML      | Sigma              | Water for molecular biology (PCR water) | 562         |

### Methods

- Thaw all reagents on ice. Make a mix of Taqman Universal Master mix, Taqman primer/probe and PCR water according to the table below. Pipet **15 µl** of this **mix/well** of an optical 96-well reaction plate (MicroAmp®, Applied Biosystems). Use filter tips (new tip/well) and work precise. Include a standard curve for each gene (minimal 5 concentrations). Perform all manipulation in room 7.36, pre-PCR.
- Thaw samples on ice. Add **5 µl cDNA/well** (laminar flow or bench) (no samples in pre-PCR). If possible, all samples need to be done in triplicate (only when you have not enough sample, duplicate is also fine).
- Close the 96-well plate with a seal and centrifuge for 1' to remove air bubbles at the bottom of the plate (small centrifuge next to PCR device).

|                                             | Final concentration | 1 reaction |
|---------------------------------------------|---------------------|------------|
|                                             |                     | µl         |
| Taqman Universal Master mix II, no UNG (2x) | 1 x                 | 10         |
| PCR water                                   |                     | 4          |
| Taqman primer/probe (20x)                   | 1x                  | 1          |
| cDNA                                        | x ng                | 5          |
| <b>Total volume</b>                         |                     | 20         |

- Open StepOne software and use the qRT-PCR conditions below:
  - denaturation: 10' @ 95°C
  - annealing and extension: 45x (30'' @ 95°C and 1' @ 60°C)
